# Supplementary material
Source: publisher site journal article supplement (https://www.dovepress.com/article/472014)
Supplement: Supplementary file 1 [file get_supplementary_file.php]

## **Supplementary material**

### **Supplementary tables**

Table S1. Instrumental variables of OSA on asthma, adult-onset asthma, child-onset asthma and moderate-to-severe asthma (with SNPs reaching  $P < 5 \times 10^{-8}$ ,  $F > 10$ ).

Table S2. The MR analyses results of weighted median and MR-Egger methods between OSA and asthma.

Table S3. Heterogeneity and horizontal pleiotropy analyses between OSA and asthma.

Table S4. Instrumental variables of asthma, adult-onset asthma, child-onset asthma and moderate-to-severe asthma on OSA (with SNPs reaching  $P < 5 \times 10^{-8}$ ,  $F > 10$ ).

### **Supplementary figures**

Figure S1. Detailed genetic instrument screening flowchart for the causal associations of OSA on asthma, adult-onset asthma, child-onset asthma and moderate-to-severe asthma.

Figure S2. The forest plots of the MR effect size. A) the forest plots of the MR effect size for OSA on asthma; B) the forest plots of the MR effect size for OSA on adult-onset asthma; C) the forest plots of the MR effect size for OSA on child-onset asthma; D) the forest plots of the MR effect size for OSA on moderate-to-severe asthma.

Figure S3. The MR leave-one-out sensitivity analysis. A) the MR leave-one-out sensitivity analysis for OSA on asthma; B) the MR leave-one-out sensitivity analysis for OSA on adult-onset asthma; C) the MR leave-one-out sensitivity analysis for OSA on child-onset asthma; D) the MR leave-one-out sensitivity analysis for OSA on moderate-to-severe asthma.

Figure S4. The funnel plots. A) the funnel plot of the causal effect of OSA on asthma; B) the funnel plot of the causal effect of OSA on adult-onset asthma; C) the funnel plot of the causal effect of OSA on child-onset asthma; D) the funnel plot of the causal effect of OSA on moderate-to-severe asthma.

Figure S5. Detailed genetic instrument screening flowchart for the causal associations of asthma, adult-onset asthma, child-onset asthma and moderate-to-severe asthma on OSA.

Figure S6. The forest plots of the MR effect size. A) the forest plots of the MR effect size for asthma on OSA; B) the forest plots of the MR effect size for child-onset asthma on OSA; C) the forest plots of the MR effect size for adult-onset asthma on OSA; D) the forest plots of the MR effect size for moderate-to-severe asthma on OSA.

Figure S7. The MR leave-one-out sensitivity analysis. A) the MR leave-one-out sensitivity analysis for asthma on OSA; B) the MR leave-one-out sensitivity analysis for child-onset asthma on OSA; C) the MR leave-one-out sensitivity analysis for adult-onset asthma on OSA; D) the MR leave-one-out sensitivity analysis for moderate-to-severe asthma on OSA.

Figure S8. The scatter plots. A) the scatter plots of SNP effect for asthma on OSA; B) the scatter plots of SNP effect for child-onset asthma on OSA; C) the scatter plots of SNP effect for adult-onset asthma on OSA; D) the scatter plots of SNP effect for moderate-to-severe asthma on OSA.

Figure S9. The funnel plots. A) the funnel plot of the causal effect of asthma on OSA; B) the funnel plot of the causal effect of child-onset asthma on OSA; C) the funnel plot of the causal effect of adult-onset asthma on OSA; D) the funnel plot of the causal effect of moderate-to-severe asthma on OSA.

## Tables

**Table S1.** Instrumental variables of OSA on asthma, adult-onset asthma, child-onset asthma and moderate-to-severe asthma (with SNPs reaching  $P < 5 \times 10^{-8}$ ,  $F > 10$ ).

| Exposure | Outcome            | SNP         | Effect_allele | Other_allele | EAF    | Beta    | SE     | P        | F     |
|----------|--------------------|-------------|---------------|--------------|--------|---------|--------|----------|-------|
| OSA      | Asthma             | rs10507084  | T             | C            | 0.1795 | 0.0650  | 0.0097 | 1.81E-11 | 45.17 |
|          |                    | rs10928510  | G             | A            | 0.1605 | -0.0565 | 0.0103 | 4.35E-08 | 29.99 |
|          |                    | rs11030374  | G             | T            | 0.4860 | -0.0457 | 0.0075 | 9.14E-10 | 37.50 |
|          |                    | rs113955098 | A             | G            | 0.0675 | -0.0979 | 0.0153 | 1.74E-10 | 40.74 |
|          |                    | rs114106239 | T             | C            | 0.0371 | -0.1174 | 0.0205 | 9.80E-09 | 32.88 |
|          |                    | rs11619393  | C             | T            | 0.0766 | 0.0775  | 0.0138 | 1.91E-08 | 31.58 |
|          |                    | rs12485486  | G             | C            | 0.3406 | 0.0433  | 0.0078 | 3.38E-08 | 30.48 |
|          |                    | rs12511115  | C             | G            | 0.2956 | 0.0473  | 0.0082 | 7.19E-09 | 33.48 |
|          |                    | rs2016950   | T             | C            | 0.1580 | -0.0573 | 0.0104 | 3.23E-08 | 30.57 |
|          |                    | rs58570686  | T             | C            | 0.2006 | -0.0538 | 0.0094 | 9.97E-09 | 32.85 |
|          |                    | rs59333125  | C             | A            | 0.0807 | -0.0764 | 0.0139 | 4.00E-08 | 30.15 |
|          |                    | rs76229479  | C             | A            | 0.0988 | -0.0729 | 0.0127 | 9.35E-09 | 32.97 |
| OSA      | Adult-onset asthma | rs10928510  | G             | A            | 0.1605 | -0.0565 | 0.0103 | 4.35E-08 | 29.99 |
|          |                    | rs114106239 | T             | C            | 0.0371 | -0.1174 | 0.0205 | 9.80E-09 | 32.88 |
|          |                    | rs11619393  | C             | T            | 0.0766 | 0.0775  | 0.0138 | 1.91E-08 | 31.58 |
|          |                    | rs144468328 | A             | G            | 0.0568 | -0.0917 | 0.0167 | 3.70E-08 | 30.30 |
|          |                    | rs2016950   | T             | C            | 0.1580 | -0.0573 | 0.0104 | 3.23E-08 | 30.57 |

|     |                                  |             |   |   |        |         |        |          |       |
|-----|----------------------------------|-------------|---|---|--------|---------|--------|----------|-------|
|     |                                  | rs59333125  | C | A | 0.0807 | -0.0764 | 0.0139 | 4.00E-08 | 30.15 |
|     |                                  | rs76229479  | C | A | 0.0988 | -0.0729 | 0.0127 | 9.35E-09 | 32.97 |
| OSA | Child-onset<br>asthma            | rs10928510  | G | A | 0.1605 | -0.0565 | 0.0103 | 4.35E-08 | 29.99 |
|     |                                  | rs114106239 | T | C | 0.0371 | -0.1174 | 0.0205 | 9.80E-09 | 32.88 |
|     |                                  | rs11619393  | C | T | 0.0766 | 0.0775  | 0.0138 | 1.91E-08 | 31.58 |
|     |                                  | rs144468328 | A | G | 0.0568 | -0.0917 | 0.0167 | 3.70E-08 | 30.30 |
|     |                                  | rs2016950   | T | C | 0.1580 | -0.0573 | 0.0104 | 3.23E-08 | 30.57 |
|     |                                  | rs59333125  | C | A | 0.0807 | -0.0764 | 0.0139 | 4.00E-08 | 30.15 |
|     |                                  | rs76229479  | C | A | 0.0988 | -0.0729 | 0.0127 | 9.35E-09 | 32.97 |
| OSA | Moderate-to-<br>severe<br>asthma | rs10507084  | T | C | 0.1795 | 0.0650  | 0.0097 | 1.81E-11 | 45.17 |
|     |                                  | rs11030374  | G | T | 0.4860 | -0.0457 | 0.0075 | 9.14E-10 | 37.50 |
|     |                                  | rs113955098 | A | G | 0.0675 | -0.0979 | 0.0153 | 1.74E-10 | 40.74 |
|     |                                  | rs114106239 | T | C | 0.0371 | -0.1174 | 0.0205 | 9.80E-09 | 32.88 |
|     |                                  | rs11619393  | C | T | 0.0766 | 0.0775  | 0.0138 | 1.91E-08 | 31.58 |
|     |                                  | rs12485486  | G | C | 0.3406 | 0.0433  | 0.0078 | 3.38E-08 | 30.48 |
|     |                                  | rs12511115  | C | G | 0.2956 | 0.0473  | 0.0082 | 7.19E-09 | 33.48 |
|     |                                  | rs144468328 | A | G | 0.0568 | -0.0917 | 0.0167 | 3.70E-08 | 30.30 |
|     |                                  | rs2016950   | T | C | 0.1580 | -0.0573 | 0.0104 | 3.23E-08 | 30.57 |
|     |                                  | rs58570686  | T | C | 0.2006 | -0.0538 | 0.0094 | 9.97E-09 | 32.85 |
|     |                                  | rs59333125  | C | A | 0.0807 | -0.0764 | 0.0139 | 4.00E-08 | 30.15 |
|     |                                  | rs76229479  | C | A | 0.0988 | -0.0729 | 0.0127 | 9.35E-09 | 32.97 |

**Abbreviations:** OSA, obstructive sleep apnea; SNP, single-nucleotide polymorphisms; EAF, effect allele frequency; SE, standard error; F = F-Statistic.

**Table S2.** The MR analyses results of weighted median and MR-Egger methods between OSA and asthma.

| Exposure                  | Outcome                   | MR analyses results |      |                     |       |
|---------------------------|---------------------------|---------------------|------|---------------------|-------|
|                           |                           | Method              | nSNP | OR (95%CI)          | p     |
| OSA                       | Asthma                    | MR-Egger            | 12   | 1.41(0.96 to 2.07)  | 0.113 |
|                           |                           | Weighted median     |      | 1.05(0.92 to 1.19)  | 0.462 |
|                           | Adult-onset asthma        | MR-Egger            | 7    | 1.13(0.28 to 4.62)  | 0.868 |
|                           |                           | Weighted median     |      | 0.95(0.76 to 1.18)  | 0.619 |
|                           | Child-onset asthma        | MR-Egger            | 7    | 3.34(0.45 to 24.81) | 0.292 |
|                           |                           | Weighted median     |      | 1.46(1.02 to 2.10)  | 0.041 |
|                           | Moderate-to-severe asthma | MR-Egger            | 12   | 4.72(1.10 to 20.25) | 0.063 |
|                           |                           | Weighted median     |      | 1.11(0.70 to 1.78)  | 0.650 |
| Asthma                    | OSA                       | MR-Egger            | 66   | 1.10(0.98 to 1.24)  | 0.106 |
|                           |                           | Weighted median     |      | 1.04(0.99 to 1.10)  | 0.123 |
| Adult-onset asthma        |                           | MR-Egger            | 13   | 1.22 (0.91 to 1.63) | 0.216 |
|                           |                           | Weighted median     |      | 1.04(0.96 to 1.13)  | 0.381 |
| Child-onset asthma        |                           | MR-Egger            | 41   | 1.00(0.95 to 1.06)  | 0.885 |
|                           |                           | Weighted median     |      | 1.01(0.98 to 1.04)  | 0.363 |
| Moderate-to-severe asthma |                           | MR-Egger            | 14   | 1.10(0.91 to 1.33)  | 0.358 |
|                           |                           | Weighted median     |      | 1.03(1.00 to 1.07)  | 0.075 |

**Abbreviations:** MR, Mendelian randomization; OSA, obstructive sleep apnea; SNP, single-nucleotide

polymorphisms; OR, odds ratio; CI, confidence interval.



**Table S3.** Heterogeneity and horizontal pleiotropy analyses between OSA and asthma.

| Exposure                  | Outcome                   | Heterogeneity |             |         | Horizontal pleiotropy |        |       |
|---------------------------|---------------------------|---------------|-------------|---------|-----------------------|--------|-------|
|                           |                           | Method        | Cochran's Q | p       | MR-egger intercept    | p      |       |
| OSA                       | Asthma                    | MR-Egger      | 10.921      | 0.364   | -0.016                | 0.190  |       |
|                           |                           | IVW           | 13.080      | 0.288   |                       |        |       |
|                           | Adult-onset asthma        | MR-Egger      | 10.844      | 0.055   | -0.007                | 0.900  |       |
|                           |                           | IVW           | 10.883      | 0.092   |                       |        |       |
|                           | Child-onset asthma        | MR-Egger      | 9.413       | 0.094   | -0.058                | 0.459  |       |
|                           |                           | IVW           | 10.623      | 0.101   |                       |        |       |
|                           | Moderate-to-severe asthma | MR-Egger      | 14.225      | 0.163   | -0.09934              | 0.047  |       |
|                           |                           | IVW           | 21.490      | 0.029   |                       |        |       |
|                           | Asthma                    | OSA           | MR-Egger    | 119.729 | <0.001                | -0.004 | 0.291 |
|                           |                           |               | IVW         | 121.852 | <0.001                |        |       |
|                           | Adult-onset asthma        | OSA           | MR-Egger    | 22.290  | 0.022                 | -0.012 | 0.331 |
|                           |                           |               | IVW         | 24.390  | 0.018                 |        |       |
| Child-onset asthma        | OSA                       | MR-Egger      | 49.631      | 0.118   | 0.001                 | 0.702  |       |
|                           |                           | IVW           | 49.820      | 0.137   |                       |        |       |
| Moderate-to-severe asthma | OSA                       | MR-Egger      | 15.761      | 0.202   | -0.010                | 0.526  |       |
|                           |                           | IVW           | 16.322      | 0.232   |                       |        |       |

**Abbreviations:** OSA, obstructive sleep apnea; IVW, inverse variance weighted method; MR, Mendelian randomization

**Table S4.** Instrumental variables of asthma, adult-onset asthma, child-onset asthma and moderate-to-severe asthma on OSA (with SNPs reaching  $P < 5 \times 10^{-8}$ ,  $F > 10$ ).

| Exposure | Outcome | SNP         | Effect_allele | Other_allele | EAf    | Beta    | SE     | P        | F      |
|----------|---------|-------------|---------------|--------------|--------|---------|--------|----------|--------|
| Asthma   | OSA     | rs10178845  | A             | G            | 0.2946 | -0.0617 | 0.0072 | 8.22E-18 | 73.90  |
|          |         | rs10477741  | G             | T            | 0.1284 | 0.0743  | 0.0098 | 3.44E-14 | 57.47  |
|          |         | rs10486391  | G             | A            | 0.4108 | -0.0389 | 0.0067 | 5.13E-09 | 34.14  |
|          |         | rs10912564  | T             | C            | 0.3065 | 0.0393  | 0.0071 | 3.37E-08 | 30.48  |
|          |         | rs11042902  | T             | C            | 0.3075 | 0.0413  | 0.0071 | 6.17E-09 | 33.78  |
|          |         | rs11071559  | T             | C            | 0.1280 | -0.0847 | 0.0098 | 4.21E-18 | 75.22  |
|          |         | rs11088309  | G             | C            | 0.1425 | 0.0605  | 0.0093 | 8.55E-11 | 42.13  |
|          |         | rs11178649  | T             | G            | 0.4072 | -0.0429 | 0.0066 | 1.06E-10 | 41.70  |
|          |         | rs112267124 | A             | G            | 0.2342 | 0.0429  | 0.0077 | 2.55E-08 | 31.02  |
|          |         | rs11567923  | CT            | C            | 0.1932 | 0.0498  | 0.0084 | 2.95E-09 | 35.22  |
|          |         | rs117552144 | T             | C            | 0.0668 | 0.0795  | 0.0138 | 8.51E-09 | 33.15  |
|          |         | rs117710327 | A             | C            | 0.0670 | -0.1264 | 0.0134 | 3.84E-21 | 89.05  |
|          |         | rs11816044  | A             | G            | 0.3256 | -0.0473 | 0.0070 | 1.20E-11 | 45.96  |
|          |         | rs12123821  | T             | C            | 0.0482 | 0.1457  | 0.0153 | 1.81E-21 | 90.54  |
|          |         | rs12365699  | A             | G            | 0.1667 | -0.0535 | 0.0088 | 1.16E-09 | 37.04  |
|          |         | rs12964116  | G             | A            | 0.0355 | 0.1076  | 0.0177 | 1.08E-09 | 37.17  |
|          |         | rs13277355  | G             | A            | 0.7260 | -0.0406 | 0.0073 | 3.09E-08 | 30.65  |
|          |         | rs1444782   | A             | G            | 0.4236 | -0.0955 | 0.0066 | 2.14E-47 | 209.12 |

|  |  |             |       |   |        |         |        |          |        |
|--|--|-------------|-------|---|--------|---------|--------|----------|--------|
|  |  | rs148639908 | AT    | A | 0.3536 | -0.0707 | 0.0068 | 3.35E-25 | 107.56 |
|  |  | rs1608555   | T     | C | 0.3585 | 0.0377  | 0.0068 | 3.14E-08 | 30.62  |
|  |  | rs1684466   | A     | G | 0.6377 | -0.0569 | 0.0070 | 4.92E-16 | 65.83  |
|  |  | rs16903574  | G     | C | 0.0765 | 0.0866  | 0.0125 | 5.31E-12 | 47.57  |
|  |  | rs17454584  | G     | A | 0.2186 | 0.0598  | 0.0079 | 3.52E-14 | 57.42  |
|  |  | rs1837253   | C     | T | 0.7397 | 0.1084  | 0.0075 | 1.49E-47 | 209.84 |
|  |  | rs1870140   | G     | A | 0.8458 | -0.0498 | 0.0091 | 3.96E-08 | 30.17  |
|  |  | rs200491113 | GTAGA | G | 0.0320 | -0.1288 | 0.0187 | 6.28E-12 | 47.24  |
|  |  | rs2296618   | G     | A | 0.1353 | -0.0619 | 0.0096 | 1.30E-10 | 41.30  |
|  |  | rs2412099   | A     | G | 0.4214 | -0.0513 | 0.0066 | 9.89E-15 | 59.92  |
|  |  | rs2477923   | C     | T | 0.4633 | -0.0361 | 0.0066 | 3.64E-08 | 30.33  |
|  |  | rs28498223  | T     | C | 0.2808 | 0.0497  | 0.0073 | 1.05E-11 | 46.23  |
|  |  | rs3024971   | G     | T | 0.1071 | -0.1122 | 0.0106 | 4.67E-26 | 111.47 |
|  |  | rs34290285  | A     | G | 0.2554 | -0.0989 | 0.0075 | 1.38E-39 | 173.33 |
|  |  | rs35225972  | A     | G | 0.6828 | 0.0438  | 0.0070 | 4.42E-10 | 38.92  |
|  |  | rs35320232  | T     | C | 0.1188 | -0.0558 | 0.0101 | 3.67E-08 | 30.32  |
|  |  | rs35441874  | A     | T | 0.2471 | -0.0825 | 0.0076 | 2.47E-27 | 117.30 |
|  |  | rs35570272  | T     | G | 0.3963 | 0.0509  | 0.0067 | 2.91E-14 | 57.80  |
|  |  | rs35621564  | G     | A | 0.3652 | -0.0444 | 0.0068 | 7.50E-11 | 42.38  |
|  |  | rs368981    | A     | G | 0.7089 | 0.0562  | 0.0072 | 7.57E-15 | 60.44  |
|  |  | rs3785356   | T     | C | 0.2980 | 0.0563  | 0.0072 | 3.85E-15 | 61.77  |

|  |  |            |   |   |        |         |        |          |        |
|--|--|------------|---|---|--------|---------|--------|----------|--------|
|  |  | rs3827780  | A | G | 0.5551 | -0.0369 | 0.0066 | 2.02E-08 | 31.48  |
|  |  | rs413214   | A | G | 0.6162 | 0.0469  | 0.0067 | 2.68E-12 | 48.91  |
|  |  | rs4722758  | G | C | 0.1996 | 0.0634  | 0.0081 | 7.21E-15 | 60.54  |
|  |  | rs4736639  | C | G | 0.2862 | -0.0397 | 0.0072 | 4.05E-08 | 30.13  |
|  |  | rs4739738  | A | G | 0.6416 | -0.0679 | 0.0068 | 1.86E-23 | 99.60  |
|  |  | rs4795401  | G | A | 0.5106 | -0.1026 | 0.0065 | 1.16E-55 | 247.03 |
|  |  | rs479844   | G | A | 0.5547 | 0.0403  | 0.0066 | 7.70E-10 | 37.83  |
|  |  | rs4842921  | A | G | 0.3875 | -0.0407 | 0.0067 | 1.17E-09 | 37.02  |
|  |  | rs56375023 | A | G | 0.2373 | 0.1035  | 0.0077 | 3.18E-41 | 180.84 |
|  |  | rs5743618  | A | C | 0.2257 | -0.0664 | 0.0079 | 2.86E-17 | 71.43  |
|  |  | rs61816766 | C | T | 0.0332 | 0.1353  | 0.0187 | 4.51E-13 | 52.41  |
|  |  | rs72823641 | A | T | 0.1367 | -0.1478 | 0.0096 | 2.56E-53 | 236.27 |
|  |  | rs7423358  | C | T | 0.7581 | 0.0430  | 0.0076 | 1.83E-08 | 31.67  |
|  |  | rs7626218  | T | A | 0.3952 | -0.0414 | 0.0067 | 5.96E-10 | 38.33  |
|  |  | rs76493820 | G | C | 0.0580 | 0.0864  | 0.0141 | 8.21E-10 | 37.71  |
|  |  | rs7734635  | G | A | 0.1543 | 0.0768  | 0.0091 | 2.48E-17 | 71.72  |
|  |  | rs7770794  | A | G | 0.2858 | 0.0416  | 0.0072 | 8.81E-09 | 33.09  |
|  |  | rs78556180 | T | G | 0.1468 | 0.0507  | 0.0092 | 3.99E-08 | 30.15  |
|  |  | rs7936312  | T | G | 0.4768 | 0.0838  | 0.0065 | 9.54E-38 | 164.91 |
|  |  | rs7961712  | A | G | 0.8499 | 0.0565  | 0.0092 | 7.35E-10 | 37.93  |
|  |  | rs802731   | G | C | 0.2709 | 0.0479  | 0.0073 | 6.54E-11 | 42.65  |

|                               |            |             |    |         |        |          |        |          |        |
|-------------------------------|------------|-------------|----|---------|--------|----------|--------|----------|--------|
|                               |            | rs848       | C  | A       | 0.8179 | -0.0963  | 0.0085 | 5.80E-30 | 129.31 |
|                               |            | rs912131    | G  | A       | 0.7039 | 0.0581   | 0.0071 | 4.04E-16 | 66.22  |
|                               |            | rs919826    | C  | T       | 0.4900 | -0.0358  | 0.0065 | 4.65E-08 | 29.86  |
|                               |            | rs9272226   | T  | C       | 0.6282 | -0.0898  | 0.0095 | 2.37E-21 | 90.01  |
|                               |            | rs981625    | G  | C       | 0.0650 | 0.0725   | 0.0132 | 4.16E-08 | 30.07  |
|                               |            | rs992969    | G  | A       | 0.7476 | -0.1199  | 0.0076 | 1.25E-56 | 251.46 |
| <b>Adult-onset<br/>asthma</b> | <b>OSA</b> | rs1023518   | G  | T       | NA     | -0.0746  | 0.0105 | 1.20E-12 | 50.85  |
|                               |            | rs118013485 | G  | A       | NA     | 0.1015   | 0.0187 | 4.50E-08 | 29.51  |
|                               |            | rs1474011   | G  | A       | NA     | -0.0597  | 0.0092 | 8.00E-11 | 42.02  |
|                               |            | rs1775554   | A  | C       | NA     | 0.1040   | 0.0093 | 2.90E-29 | 124.88 |
|                               |            | rs17843580  | A  | G       | NA     | -0.1317  | 0.0179 | 8.80E-14 | 54.22  |
|                               |            | rs1837253   | T  | C       | NA     | -0.0779  | 0.0105 | 8.80E-14 | 55.59  |
|                               |            | rs3024971   | T  | G       | NA     | 0.0972   | 0.0148 | 5.10E-11 | 43.02  |
|                               |            | rs34290285  | G  | A       | NA     | 0.0699   | 0.0105 | 3.40E-11 | 44.17  |
|                               |            | rs56389811  | C  | T       | NA     | 0.0647   | 0.0108 | 1.60E-09 | 36.00  |
|                               |            | rs6454805   | A  | G       | NA     | 0.0610   | 0.0096 | 1.50E-10 | 40.39  |
|                               |            | rs6985449   | G  | A       | NA     | 0.0584   | 0.0096 | 1.20E-09 | 36.67  |
|                               |            | rs72743461  | C  | A       | NA     | -0.0787  | 0.0109 | 3.30E-13 | 52.63  |
| rs7936312                     | G          | T           | NA | -0.0609 | 0.0092 | 6.30E-11 | 43.64  |          |        |
| <b>Child-onset<br/>asthma</b> | <b>OSA</b> | rs10066308  | G  | A       | NA     | -0.0901  | 0.0153 | 6.20E-09 | 34.71  |
|                               |            | rs10791824  | A  | G       | NA     | -0.1042  | 0.0143 | 1.50E-13 | 53.35  |

|  |  |             |   |   |    |         |        |          |        |
|--|--|-------------|---|---|----|---------|--------|----------|--------|
|  |  | rs11236791  | G | A | NA | -0.1877 | 0.0142 | 4.30E-39 | 175.20 |
|  |  | rs117137535 | G | A | NA | -0.2877 | 0.0484 | 1.10E-09 | 35.38  |
|  |  | rs11727369  | G | A | NA | -0.1070 | 0.0147 | 2.10E-13 | 53.09  |
|  |  | rs118013485 | G | A | NA | 0.1827  | 0.0287 | 1.40E-10 | 40.64  |
|  |  | rs12123821  | C | T | NA | -0.4742 | 0.0330 | 5.30E-47 | 206.19 |
|  |  | rs12365699  | G | A | NA | 0.1387  | 0.0190 | 6.00E-13 | 53.47  |
|  |  | rs12413578  | C | T | NA | 0.1989  | 0.0229 | 2.20E-18 | 75.18  |
|  |  | rs12935657  | G | A | NA | 0.1450  | 0.0164 | 2.30E-18 | 78.23  |
|  |  | rs12964116  | A | G | NA | -0.3261 | 0.0382 | 1.10E-17 | 72.85  |
|  |  | rs13277355  | A | G | NA | 0.0988  | 0.0159 | 2.50E-10 | 38.86  |
|  |  | rs17481562  | C | T | NA | 0.0838  | 0.0147 | 8.10E-09 | 32.73  |
|  |  | rs17728272  | C | T | NA | -0.0975 | 0.0167 | 4.90E-09 | 34.03  |
|  |  | rs1837253   | T | C | NA | -0.1804 | 0.0160 | 1.50E-29 | 126.77 |
|  |  | rs2066844   | C | T | NA | -0.1818 | 0.0330 | 1.20E-08 | 30.32  |
|  |  | rs2252775   | T | G | NA | -0.1746 | 0.0181 | 3.30E-22 | 93.43  |
|  |  | rs2255088   | T | C | NA | -0.1042 | 0.0150 | 2.20E-12 | 47.92  |
|  |  | rs2738783   | T | G | NA | -0.0957 | 0.0173 | 4.10E-08 | 30.54  |
|  |  | rs274949    | G | A | NA | 0.0791  | 0.0141 | 1.20E-08 | 31.31  |
|  |  | rs28688825  | A | G | NA | 0.2271  | 0.0258 | 2.00E-19 | 77.72  |
|  |  | rs3122929   | C | T | NA | -0.1339 | 0.0144 | 1.00E-20 | 86.08  |
|  |  | rs34986765  | T | C | NA | 0.1662  | 0.0209 | 1.50E-15 | 63.11  |

|                                      |            |             |   |   |       |         |        |           |        |
|--------------------------------------|------------|-------------|---|---|-------|---------|--------|-----------|--------|
|                                      |            | rs35449774  | C | T | NA    | -0.1912 | 0.0248 | 1.30E-15  | 59.58  |
|                                      |            | rs3785356   | C | T | NA    | -0.1120 | 0.0155 | 2.90E-13  | 52.25  |
|                                      |            | rs4574025   | C | T | NA    | -0.0876 | 0.0142 | 5.10E-10  | 38.06  |
|                                      |            | rs4739738   | G | A | NA    | 0.1144  | 0.0147 | 7.90E-15  | 60.22  |
|                                      |            | rs4833103   | A | C | NA    | 0.1195  | 0.0144 | 1.50E-16  | 69.18  |
|                                      |            | rs56062135  | C | T | NA    | -0.1728 | 0.0166 | 2.90E-25  | 107.79 |
|                                      |            | rs6454805   | A | G | NA    | 0.0915  | 0.0147 | 1.50E-10  | 38.64  |
|                                      |            | rs6489785   | T | C | NA    | 0.0965  | 0.0145 | 1.10E-11  | 44.61  |
|                                      |            | rs6664108   | T | C | NA    | -0.0890 | 0.0153 | 5.10E-09  | 33.94  |
|                                      |            | rs6868082   | C | T | NA    | -0.1412 | 0.0248 | 6.10E-09  | 32.37  |
|                                      |            | rs7209400   | C | T | NA    | -0.0872 | 0.0142 | 1.10E-09  | 37.67  |
|                                      |            | rs78147778  | T | C | NA    | 0.1522  | 0.0164 | 9.40E-21  | 86.49  |
|                                      |            | rs7918084   | C | T | NA    | -0.0813 | 0.0142 | 3.60E-09  | 32.78  |
|                                      |            | rs8069176   | G | A | NA    | 0.3124  | 0.0141 | 1.60E-109 | 488.43 |
|                                      |            | rs892225    | A | G | NA    | -0.0862 | 0.0147 | 2.40E-09  | 34.58  |
|                                      |            | rs928412    | A | G | NA    | 0.2295  | 0.0162 | 2.90E-47  | 200.85 |
|                                      |            | rs9828592   | T | C | NA    | -0.0963 | 0.0142 | 5.00E-12  | 46.03  |
|                                      |            | rs9893132   | A | G | NA    | -0.0853 | 0.0147 | 2.50E-09  | 33.42  |
| <b>Moderate-to-severe<br/>asthma</b> | <b>OSA</b> | rs112502960 | A | G | 0.359 | 0.134   | 0.023  | 6.05E-09  | 33.94  |
|                                      |            | rs11603634  | G | A | 0.504 | 0.124   | 0.0223 | 2.30E-08  | 30.92  |
|                                      |            | rs12479210  | T | C | 0.387 | 0.183   | 0.0225 | 4.77E-16  | 66.15  |

|  |  |             |   |   |       |        |        |          |       |
|--|--|-------------|---|---|-------|--------|--------|----------|-------|
|  |  | rs13274782  | C | A | 0.623 | -0.132 | 0.0228 | 7.29E-09 | 33.52 |
|  |  | rs1438673   | T | C | 0.492 | -0.169 | 0.0221 | 2.11E-14 | 58.47 |
|  |  | rs144829310 | T | G | 0.164 | 0.207  | 0.0297 | 3.68E-12 | 48.57 |
|  |  | rs34290285  | A | G | 0.257 | -0.193 | 0.0251 | 1.41E-14 | 59.12 |
|  |  | rs3749833   | C | T | 0.261 | 0.161  | 0.0249 | 1.14E-10 | 41.80 |
|  |  | rs61840192  | A | G | 0.427 | -0.167 | 0.0224 | 8.42E-14 | 55.58 |
|  |  | rs703816    | C | T | 0.434 | 0.151  | 0.0222 | 1.18E-11 | 46.26 |
|  |  | rs7203459   | C | T | 0.246 | -0.206 | 0.0255 | 7.83E-16 | 65.26 |
|  |  | rs72743461  | A | C | 0.236 | 0.167  | 0.0258 | 1.03E-10 | 41.90 |
|  |  | rs7523907   | T | C | 0.541 | 0.135  | 0.0224 | 1.64E-09 | 36.32 |
|  |  | rs7936312   | T | G | 0.474 | 0.134  | 0.022  | 1.09E-09 | 37.10 |

**Abbreviations:** OSA, obstructive sleep apnea; SNP, single-nucleotide polymorphisms; EAF, effect allele frequency; SE, standard error; F = F-Statistic



## Figures

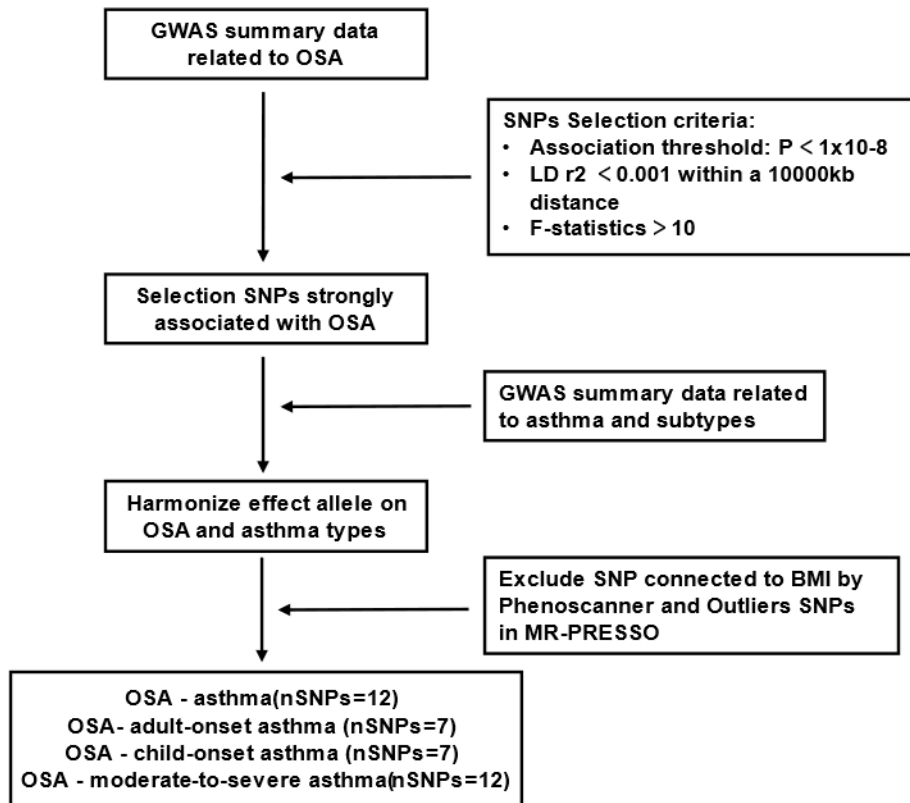

**Figure S1.** Detailed genetic instrument screening flowchart for the causal associations of OSA on asthma, adult-onset asthma, child-onset asthma and moderate-to-severe asthma.

**Abbreviations:** GWAS, genome-wide association study; OSA, obstructive sleep apnea; SNP, single-nucleotide polymorphisms; LD, linkage disequilibrium; BMI, body mass index; MR-PRESSO, Mendelian randomization - pleiotropy residual sum and outlier

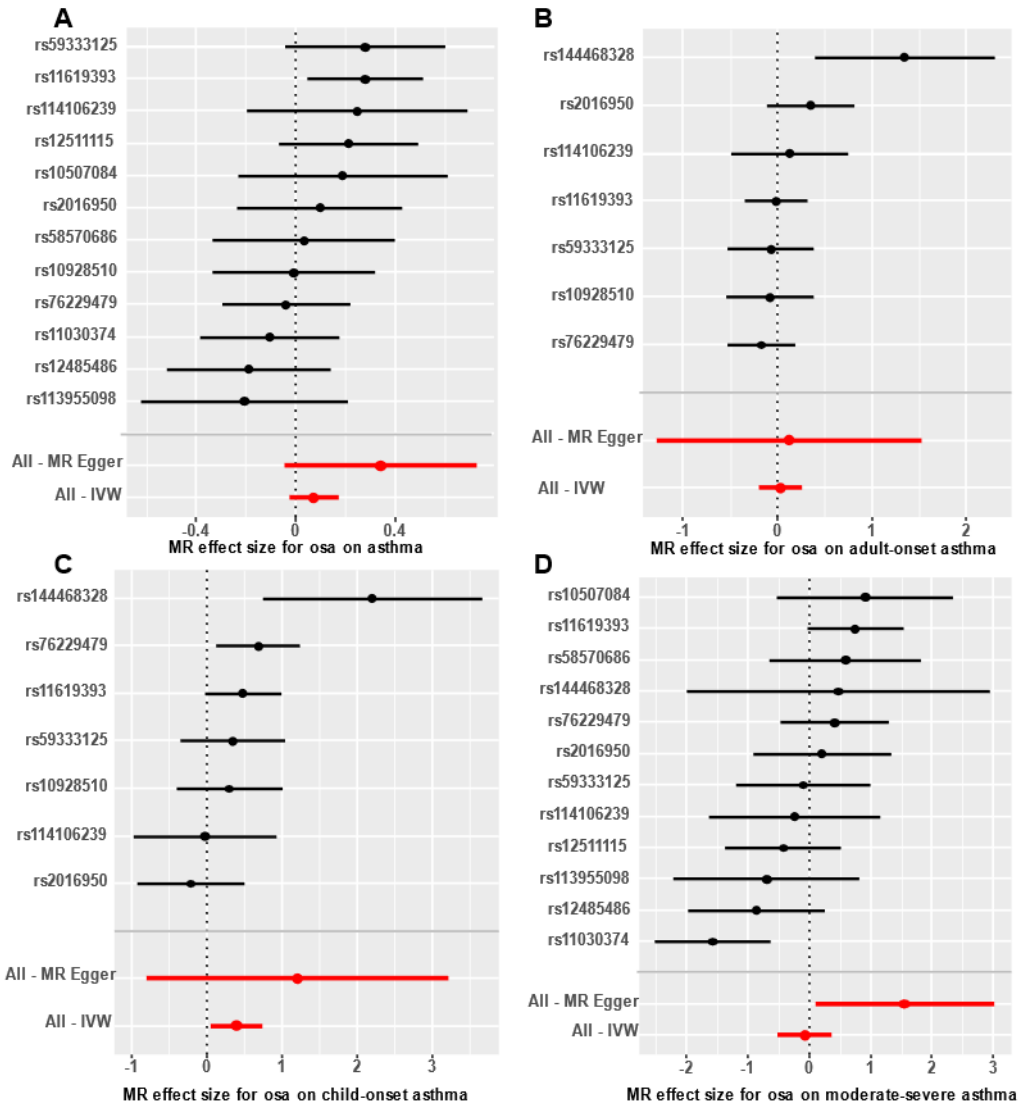

**Figure S2. The forest plots of the MR effect size.** A) the forest plots of the MR effect size for OSA on asthma; B) the forest plots of the MR effect size for OSA on adult-onset asthma; C) the forest plots of the MR effect size for OSA on child-onset asthma; D) the forest plots of the MR effect size for OSA on moderate-to-severe asthma.

**Abbreviations:** OSA, obstructive sleep apnea; MR, Mendelian randomization; IVW, inverse variance weighted method

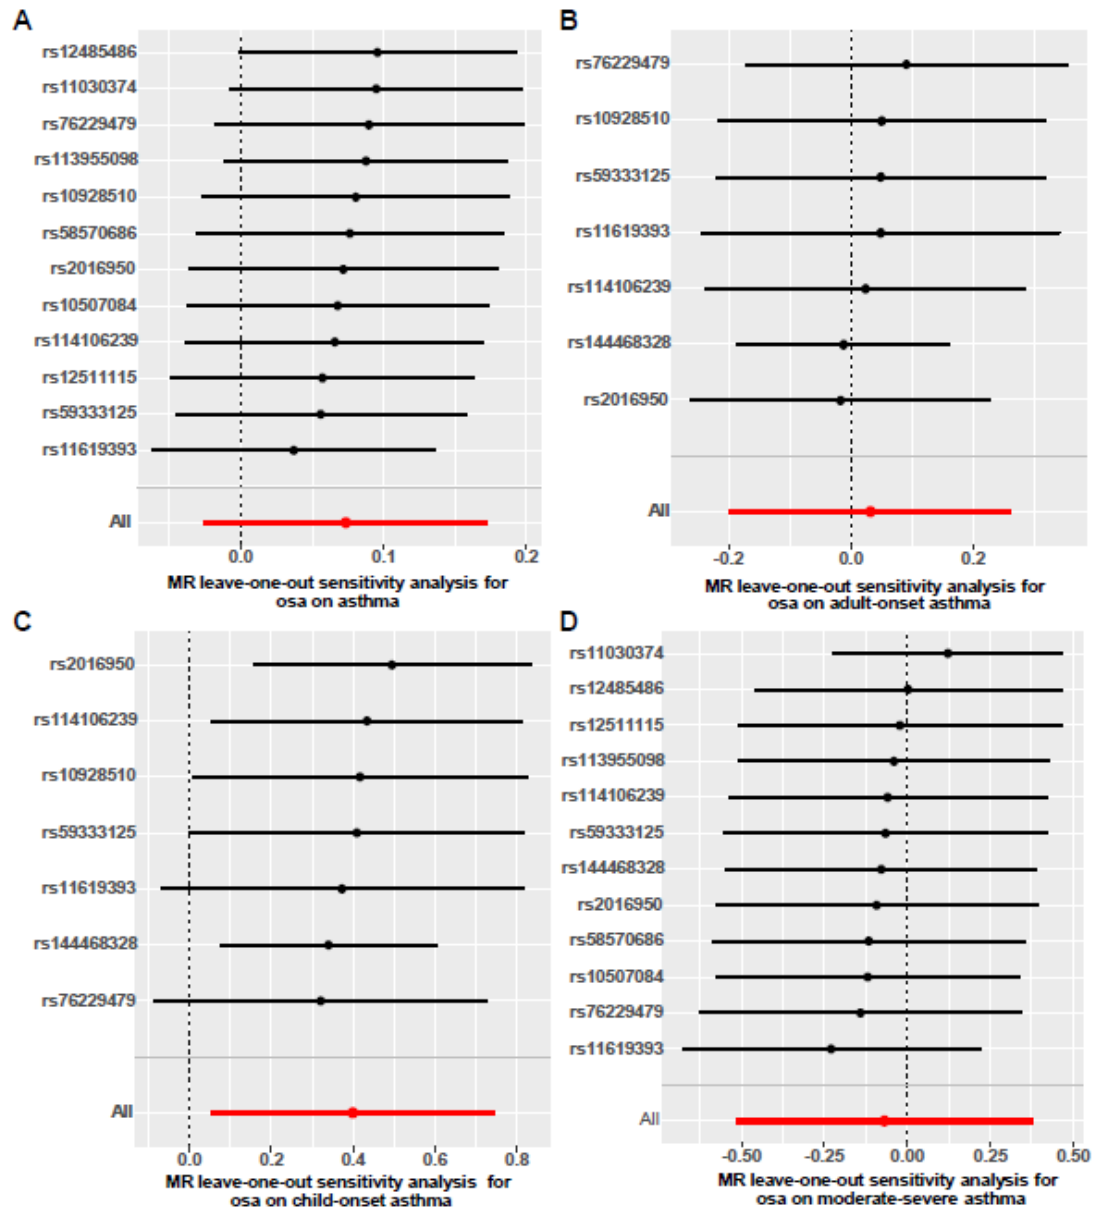

**Figure S3. The MR leave-one-out sensitivity analysis.** A) the MR leave-one-out sensitivity analysis for OSA on asthma; B) the MR leave-one-out sensitivity analysis for OSA on adult-onset asthma; C) the MR leave-one-out sensitivity analysis for OSA on child-onset asthma; D) the MR leave-one-out sensitivity analysis for OSA on moderate-to-severe asthma.

**Abbreviations:** OSA, obstructive sleep apnea; MR, Mendelian randomization.

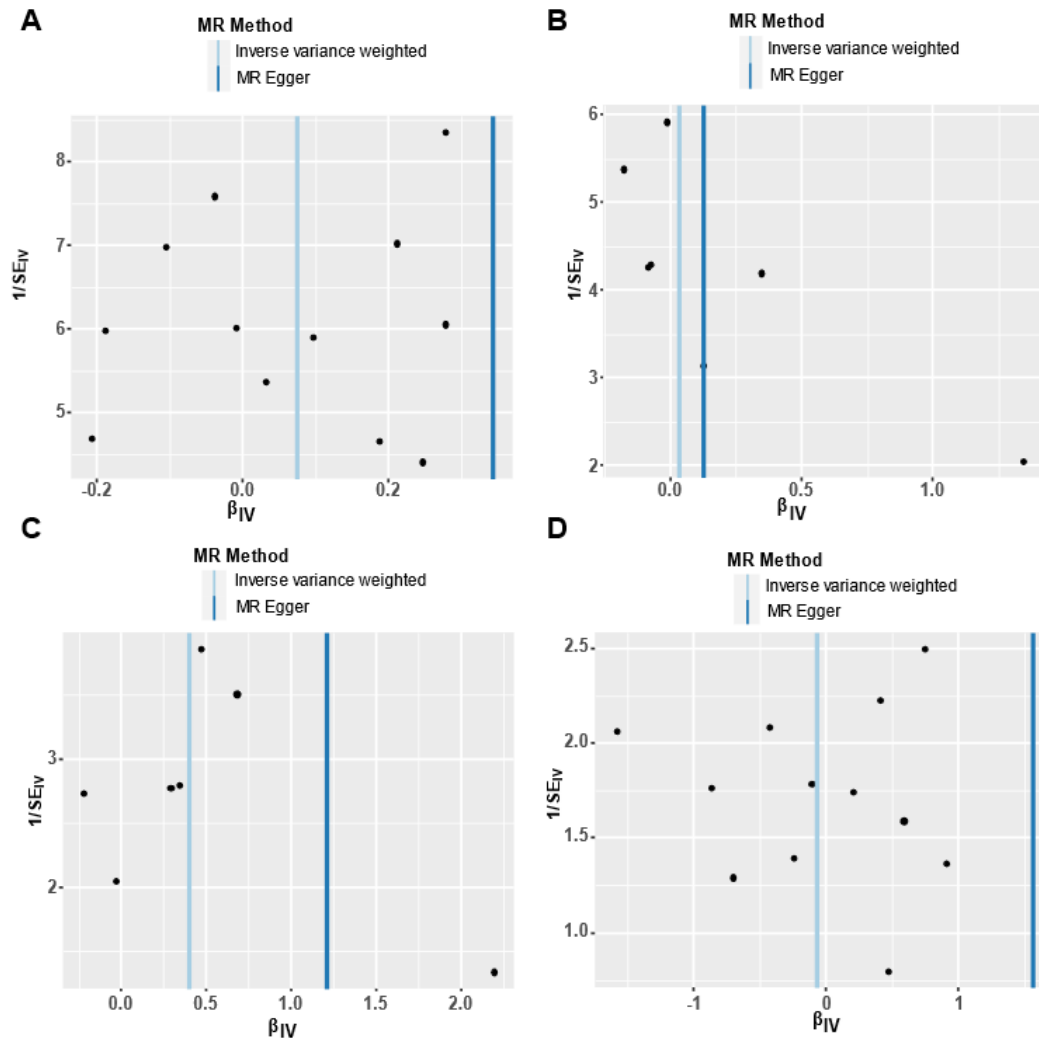

**Figure S4. The funnel plots.** A) the funnel plot of the causal effect of OSA on asthma; B) the funnel plot of the causal effect of OSA on adult-onset asthma; C) the funnel plot of the causal effect of OSA on child-onset asthma; D) the funnel plot of the causal effect of OSA on moderate-to-severe asthma.

**Abbreviations:** OSA, obstructive sleep apnea; MR, Mendelian randomization; IV, instrumental variables.

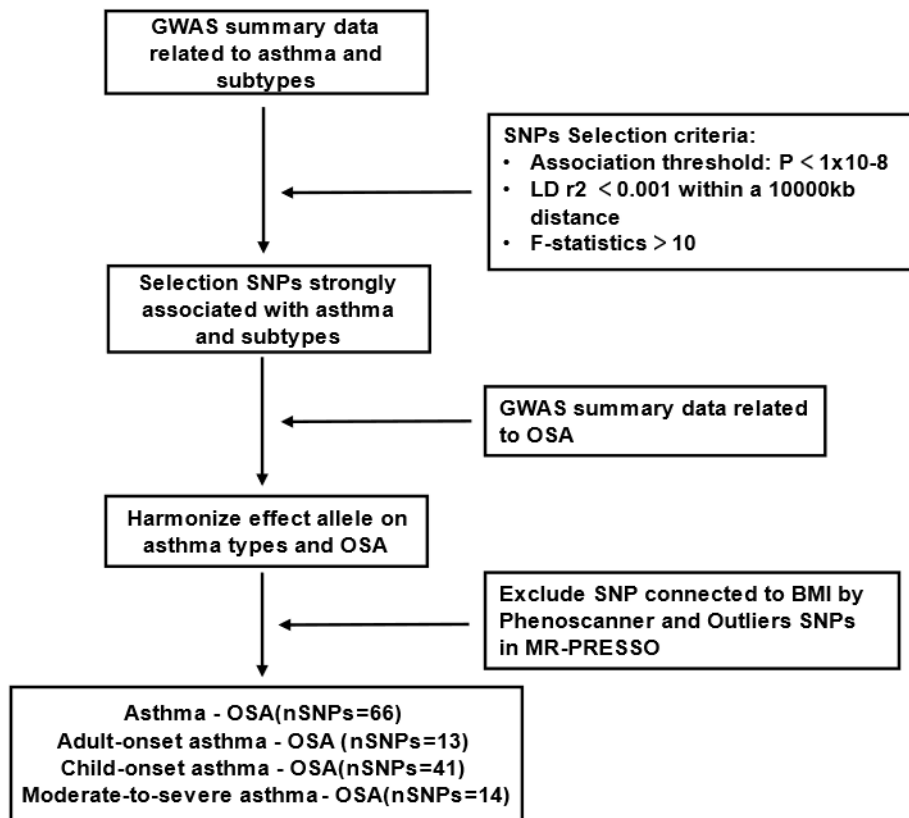

**Figure S5.** Detailed genetic instrument screening flowchart for the causal associations of asthma, adult-onset asthma, child-onset asthma and moderate-to-severe asthma on OSA.

**Abbreviations:** GWAS, genome-wide association study; OSA, obstructive sleep apnea; SNP, single-nucleotide polymorphisms; LD, linkage disequilibrium; BMI, body mass index; MR-PRESSO, Mendelian randomization - pleiotropy residual sum and outlier.

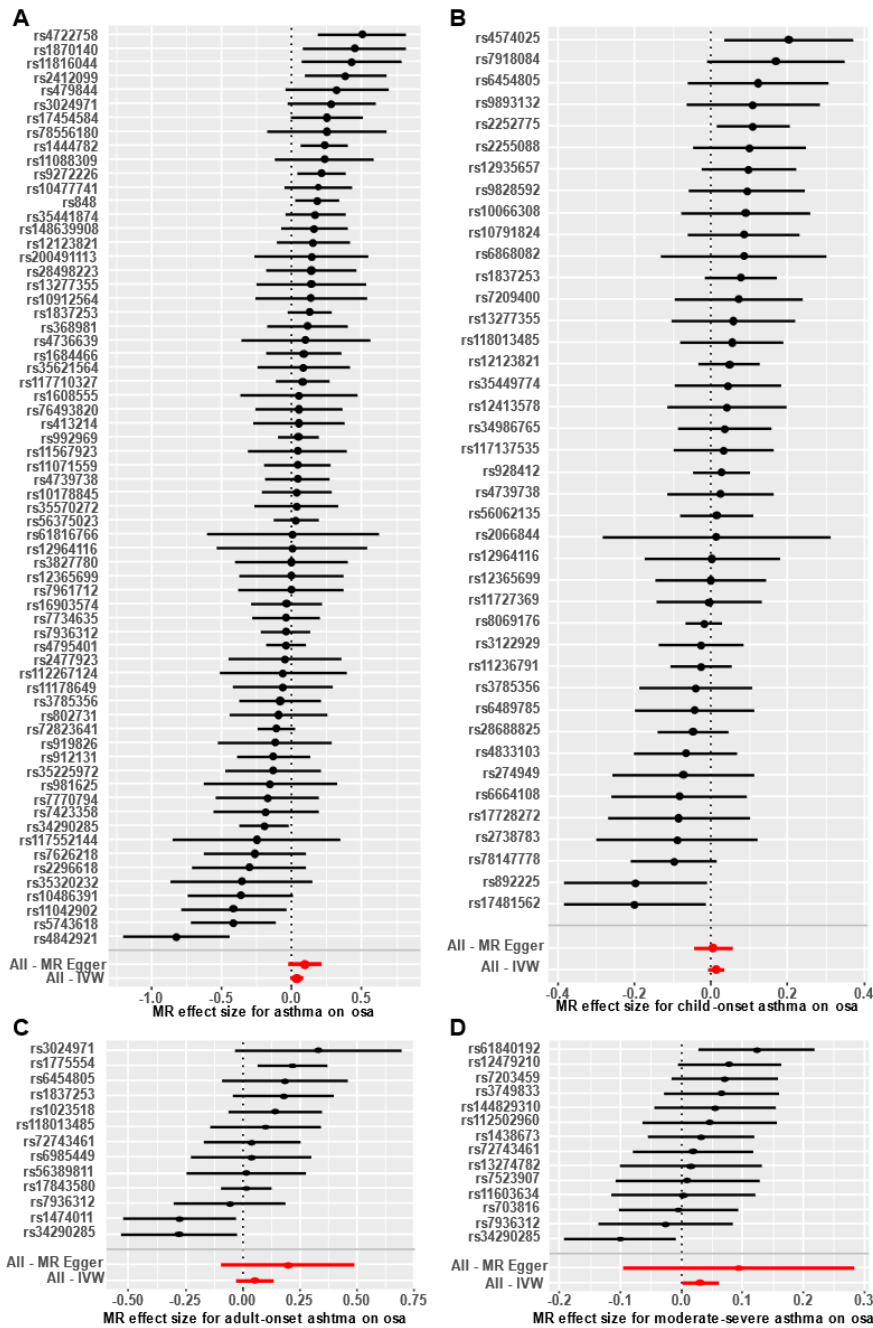

**Figure S6. The forest plots of the MR effect size.** A) the forest plots of the MR effect size for asthma on OSA; B) the forest plots of the MR effect size for child-onset asthma on OSA; C) the forest plots of the MR effect size for adult-onset asthma on OSA; D) the forest plots of the MR effect size for moderate-to-severe asthma on OSA.

**Abbreviations:** OSA, obstructive sleep apnea; MR, Mendelian randomization; IVW, inverse variance weighted method.

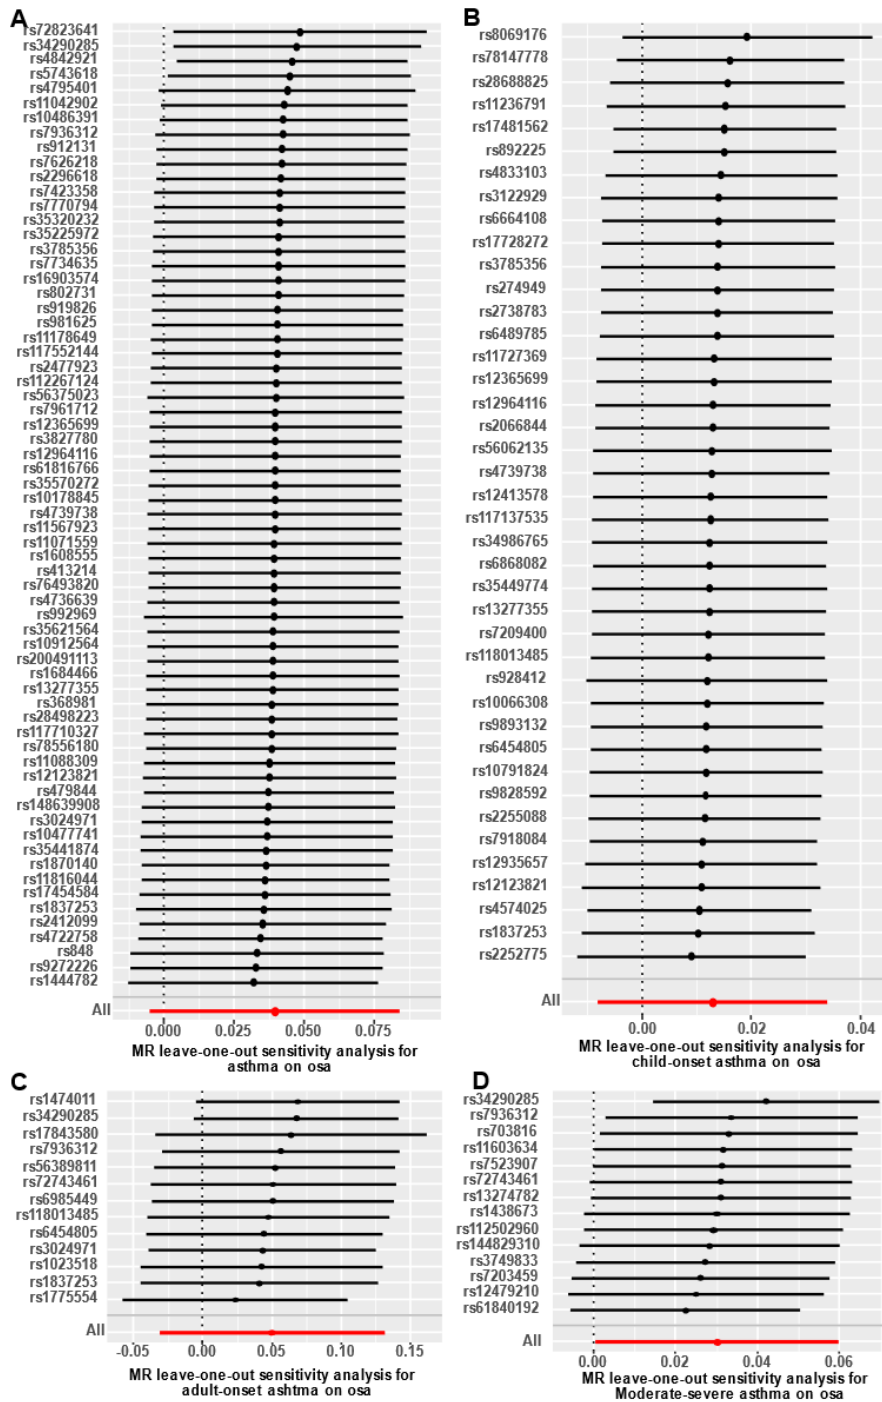

**Figure S7. The MR leave-one-out sensitivity analysis.** A) the MR leave-one-out sensitivity analysis for asthma on OSA; B) the MR leave-one-out sensitivity analysis for child-onset asthma on OSA; C) the MR leave-one-out sensitivity analysis for adult-onset asthma on OSA; D) the MR leave-one-out sensitivity analysis for moderate-to-severe asthma on OSA.

**Abbreviations:** OSA, obstructive sleep apnea; MR, Mendelian randomization.

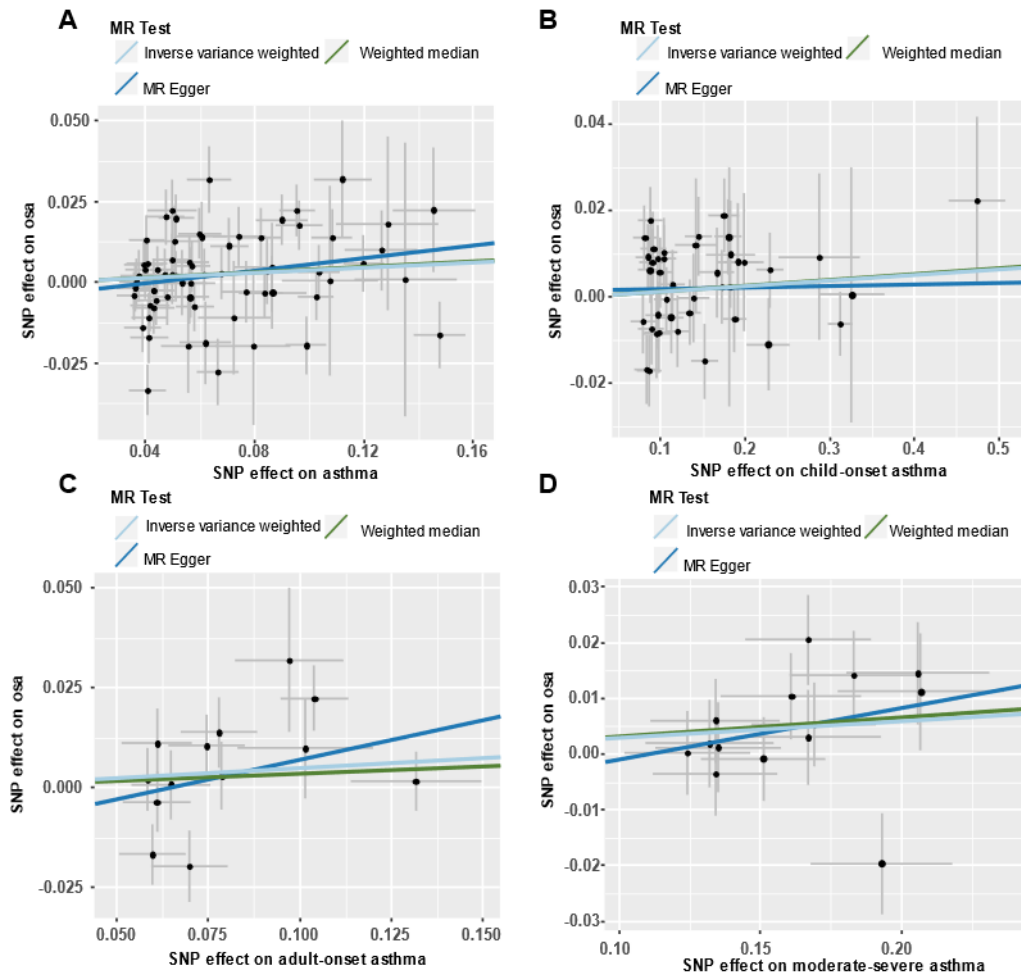

**Figure S8. The scatter plots.** A) the scatter plots of SNP effect for asthma on OSA; B) the scatter plots of SNP effect for child-onset asthma on OSA; C) the scatter plots of SNP effect for adult-onset asthma on OSA; D) the scatter plots of SNP effect for moderate-to-severe asthma on OSA.

**Abbreviations:** OSA, obstructive sleep apnea; MR, Mendelian randomization; SNP, single-nucleotide polymorphisms.



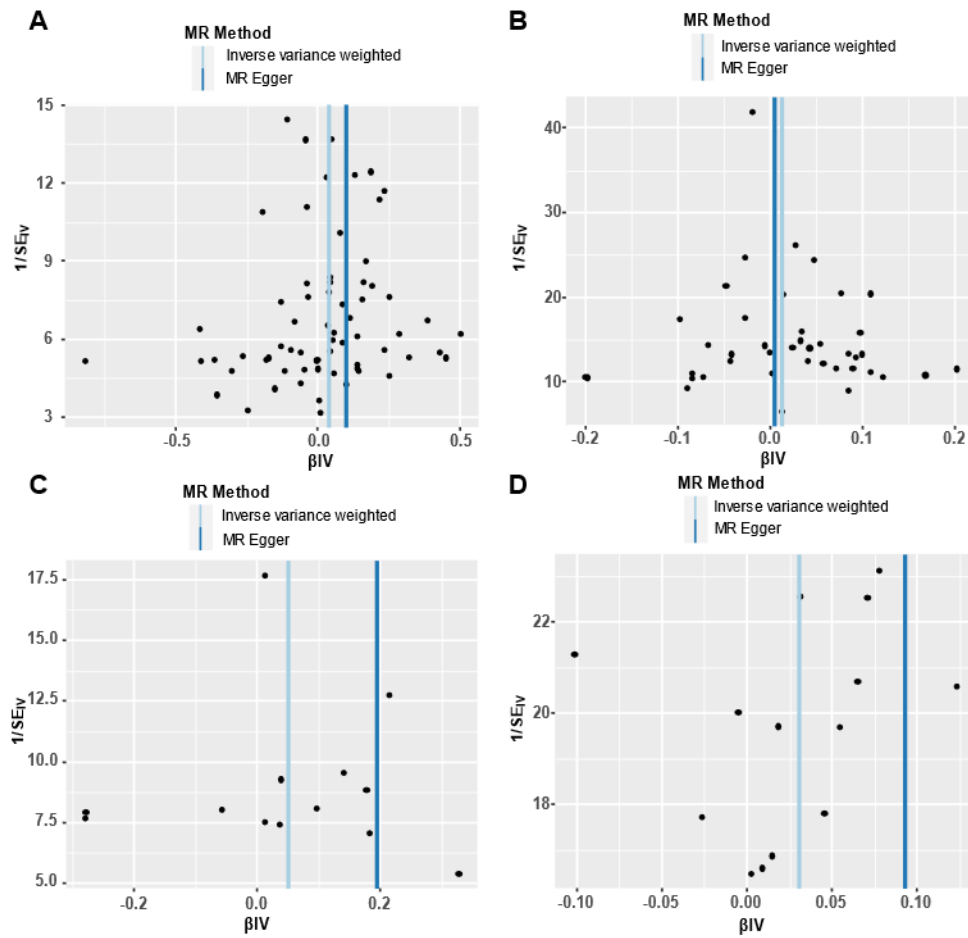

**Figure S9. The funnel plots.** A) the funnel plot of the causal effect of asthma on OSA; B) the funnel plot of the causal effect of child-onset asthma on OSA; C) the funnel plot of the causal effect of adult-onset asthma on OSA; D) the funnel plot of the causal effect of moderate-to-severe asthma on OSA.

**Abbreviations:** OSA, obstructive sleep apnea; MR, Mendelian randomization; IV, instrumental variables.
